# Supplementary material for: An Untargeted Metabolomics Investigation of Jiulong Yak (Bos grunniens) Meat by 1H-NMR
Source: PubMed Central journal article supplement (PMC7230376; doi:10.3390/foods9040481), 2020-04-12

# An untargeted metabolomics investigation of Jiulong Yak (*Bos grunniens*) meat by <sup>1</sup>H-NMR

Chenglin Zhu<sup>1</sup>, Massimiliano Petracci<sup>1</sup>, Cheng Li<sup>2</sup>, Enrico Fiore<sup>3</sup> and Luca Laghi<sup>1,\*</sup>

## SUPPLEMENTAL MATERIAL

Table S1 Concentrations (mmol/g, median (IQR)) of molecules quantified by <sup>1</sup>H-NMR

|                                            | <i>Triceps brachii</i><br>(TB)                               | <i>Biceps femoris</i><br>(BF)                               | <i>Longissimus thoracis</i><br>(LT)                         | <i>p</i> | <i>Trapezius</i><br>(TP)                       | Fold change<br>(LT/TP) |
|--------------------------------------------|--------------------------------------------------------------|-------------------------------------------------------------|-------------------------------------------------------------|----------|------------------------------------------------|------------------------|
| <b>Amino acids, Peptides and analogues</b> |                                                              |                                                             |                                                             |          |                                                |                        |
| Alanine                                    | 4.76x10 <sup>-3</sup> (1.33x10 <sup>-3</sup> ) <sup>a</sup>  | 5.31x10 <sup>-3</sup> (4.77x10 <sup>-4</sup> ) <sup>a</sup> | 3.14x10 <sup>-3</sup> (9.50x10 <sup>-4</sup> ) <sup>b</sup> | 0.003    | 3.56x10 <sup>-3</sup> (2.59x10 <sup>-5</sup> ) | 0.88                   |
| Anserine                                   | 1.27x10 <sup>-3</sup> (5.68x10 <sup>-4</sup> ) <sup>a</sup>  | 1.54x10 <sup>-3</sup> (6.66x10 <sup>-4</sup> ) <sup>a</sup> | 1.94x10 <sup>-3</sup> (6.45x10 <sup>-4</sup> ) <sup>a</sup> | 0.164    | 1.06x10 <sup>-3</sup> (3.62x10 <sup>-6</sup> ) | 1.83                   |
| <i>beta</i> -Alanine                       | 1.14x10 <sup>-4</sup> (1.21x10 <sup>-4</sup> ) <sup>a</sup>  | 1.50x10 <sup>-4</sup> (1.84x10 <sup>-4</sup> ) <sup>a</sup> | 1.12x10 <sup>-4</sup> (8.98x10 <sup>-5</sup> ) <sup>a</sup> | 0.968    | 1.26x10 <sup>-4</sup> (1.36x10 <sup>-5</sup> ) | 0.89                   |
| Betaine                                    | 2.39x10 <sup>-3</sup> (3.90x10 <sup>-4</sup> ) <sup>a</sup>  | 2.15x10 <sup>-3</sup> (5.25x10 <sup>-4</sup> ) <sup>a</sup> | 1.79x10 <sup>-3</sup> (1.00x10 <sup>-3</sup> ) <sup>a</sup> | 0.301    | 2.57x10 <sup>-3</sup> (4.09x10 <sup>-5</sup> ) | 0.70                   |
| Carnosine                                  | 1.23x10 <sup>-2</sup> (1.65x10 <sup>-3</sup> ) <sup>b</sup>  | 1.60x10 <sup>-2</sup> (8.17x10 <sup>-3</sup> ) <sup>b</sup> | 2.09x10 <sup>-2</sup> (1.84x10 <sup>-3</sup> ) <sup>a</sup> | 0.017    | 1.45x10 <sup>-2</sup> (2.97x10 <sup>-4</sup> ) | 1.44                   |
| Creatine                                   | 3.89x10 <sup>-2</sup> (2.29x10 <sup>-3</sup> ) <sup>a</sup>  | 3.68x10 <sup>-2</sup> (5.63x10 <sup>-3</sup> ) <sup>a</sup> | 4.11x10 <sup>-2</sup> (8.27x10 <sup>-4</sup> ) <sup>a</sup> | 0.389    | 3.78x10 <sup>-2</sup> (2.20x10 <sup>-4</sup> ) | 1.09                   |
| Creatinine                                 | 5.71x10 <sup>-4</sup> (7.74x10 <sup>-5</sup> ) <sup>a</sup>  | 4.95x10 <sup>-4</sup> (2.89x10 <sup>-4</sup> ) <sup>a</sup> | 7.84x10 <sup>-4</sup> (8.11x10 <sup>-5</sup> ) <sup>a</sup> | 0.094    | 6.22x10 <sup>-4</sup> (6.66x10 <sup>-5</sup> ) | 1.26                   |
| Glutamate                                  | 1.06x10 <sup>-3</sup> (2.77x10 <sup>-4</sup> ) <sup>a</sup>  | 1.41x10 <sup>-3</sup> (5.55x10 <sup>-4</sup> ) <sup>a</sup> | 7.68x10 <sup>-4</sup> (1.83x10 <sup>-4</sup> ) <sup>a</sup> | 0.096    | 1.20x10 <sup>-3</sup> (9.25x10 <sup>-5</sup> ) | 0.64                   |
| Glutamine                                  | 3.75x10 <sup>-3</sup> (3.15x10 <sup>-3</sup> ) <sup>a</sup>  | 3.26x10 <sup>-3</sup> (1.28x10 <sup>-3</sup> ) <sup>a</sup> | 1.49x10 <sup>-3</sup> (1.63x10 <sup>-4</sup> ) <sup>a</sup> | 0.051    | 3.87x10 <sup>-3</sup> (1.35x10 <sup>-4</sup> ) | 0.33 <sup>*</sup>      |
| Glutathione                                | 2.47x10 <sup>-4</sup> (9.01x10 <sup>-6</sup> ) <sup>a</sup>  | 2.80x10 <sup>-4</sup> (1.84x10 <sup>-4</sup> ) <sup>a</sup> | 1.50x10 <sup>-4</sup> (5.71x10 <sup>-5</sup> ) <sup>a</sup> | 0.136    | 1.96x10 <sup>-4</sup> (3.48x10 <sup>-5</sup> ) | 0.77                   |
| Glycine                                    | 2.26x10 <sup>-3</sup> (1.13x10 <sup>-3</sup> ) <sup>a</sup>  | 2.25x10 <sup>-3</sup> (4.31x10 <sup>-4</sup> ) <sup>a</sup> | 2.10x10 <sup>-3</sup> (2.49x10 <sup>-4</sup> ) <sup>a</sup> | 0.280    | 1.77x10 <sup>-3</sup> (2.11x10 <sup>-5</sup> ) | 1.18                   |
| Isoleucine                                 | 1.81x10 <sup>-4</sup> (3.39x10 <sup>-5</sup> ) <sup>ab</sup> | 2.33x10 <sup>-4</sup> (6.07x10 <sup>-5</sup> ) <sup>a</sup> | 1.69x10 <sup>-4</sup> (4.61x10 <sup>-5</sup> ) <sup>b</sup> | 0.012    | 2.27x10 <sup>-4</sup> (1.19x10 <sup>-5</sup> ) | 0.74                   |
| Leucine                                    | 3.54x10 <sup>-4</sup> (7.22x10 <sup>-5</sup> ) <sup>ab</sup> | 4.70x10 <sup>-4</sup> (9.67x10 <sup>-5</sup> ) <sup>a</sup> | 3.06x10 <sup>-4</sup> (9.42x10 <sup>-5</sup> ) <sup>b</sup> | 0.007    | 4.31x10 <sup>-4</sup> (1.60x10 <sup>-5</sup> ) | 0.71                   |
| Methionine                                 | 1.69x10 <sup>-3</sup> (5.95x10 <sup>-4</sup> ) <sup>a</sup>  | 1.25x10 <sup>-3</sup> (1.39x10 <sup>-3</sup> ) <sup>a</sup> | 1.68x10 <sup>-3</sup> (1.29x10 <sup>-3</sup> ) <sup>a</sup> | 0.597    | 5.14x10 <sup>-3</sup> (6.09x10 <sup>-4</sup> ) | 0.33 <sup>*</sup>      |
| N,N-Dimethylglycine                        | 1.13x10 <sup>-4</sup> (6.30x10 <sup>-6</sup> ) <sup>a</sup>  | 1.06x10 <sup>-4</sup> (1.06x10 <sup>-5</sup> ) <sup>a</sup> | 1.17x10 <sup>-4</sup> (4.17x10 <sup>-6</sup> ) <sup>a</sup> | 0.479    | 1.10x10 <sup>-4</sup> (1.54x10 <sup>-6</sup> ) | 1.06                   |
| Phenylalanine                              | 2.48x10 <sup>-4</sup> (7.34x10 <sup>-5</sup> ) <sup>ab</sup> | 3.37x10 <sup>-4</sup> (7.77x10 <sup>-5</sup> ) <sup>a</sup> | 2.39x10 <sup>-4</sup> (4.65x10 <sup>-5</sup> ) <sup>b</sup> | 0.013    | 3.10x10 <sup>-4</sup> (1.43x10 <sup>-5</sup> ) | 0.77                   |
| Proline                                    | 1.80x10 <sup>-4</sup> (3.42x10 <sup>-5</sup> ) <sup>a</sup>  | 1.68x10 <sup>-4</sup> (5.06x10 <sup>-5</sup> ) <sup>a</sup> | 1.35x10 <sup>-4</sup> (4.95x10 <sup>-5</sup> ) <sup>a</sup> | 0.074    | 2.06x10 <sup>-4</sup> (2.28x10 <sup>-5</sup> ) | 0.66                   |
| Taurine                                    | 3.05x10 <sup>-3</sup> (3.50x10 <sup>-4</sup> ) <sup>a</sup>  | 2.96x10 <sup>-3</sup> (9.75x10 <sup>-3</sup> ) <sup>a</sup> | 2.88x10 <sup>-3</sup> (3.22x10 <sup>-3</sup> ) <sup>a</sup> | 0.178    | 1.42x10 <sup>-3</sup> (2.03x10 <sup>-5</sup> ) | 2.03 <sup>*</sup>      |
| Threonine                                  | 3.25x10 <sup>-4</sup> (1.88x10 <sup>-4</sup> ) <sup>a</sup>  | 4.27x10 <sup>-4</sup> (1.55x10 <sup>-4</sup> ) <sup>a</sup> | 2.49x10 <sup>-4</sup> (4.85x10 <sup>-5</sup> ) <sup>b</sup> | 0.008    | 3.78x10 <sup>-4</sup> (4.45x10 <sup>-5</sup> ) | 0.66                   |
| Tyrosine                                   | 1.86x10 <sup>-4</sup> (2.99x10 <sup>-5</sup> ) <sup>ab</sup> | 2.02x10 <sup>-4</sup> (5.03x10 <sup>-5</sup> ) <sup>a</sup> | 1.60x10 <sup>-4</sup> (3.46x10 <sup>-5</sup> ) <sup>b</sup> | 0.011    | 2.37x10 <sup>-4</sup> (1.13x10 <sup>-5</sup> ) | 0.67                   |
| Valine                                     | 3.28x10 <sup>-4</sup> (4.58x10 <sup>-5</sup> ) <sup>ab</sup> | 3.99x10 <sup>-4</sup> (7.97x10 <sup>-5</sup> ) <sup>a</sup> | 3.03x10 <sup>-4</sup> (7.23x10 <sup>-5</sup> ) <sup>b</sup> | 0.019    | 3.85x10 <sup>-4</sup> (9.49x10 <sup>-6</sup> ) | 0.79                   |
| <b>Carbohydrates and Derivates</b>         |                                                              |                                                             |                                                             |          |                                                |                        |
| 1,3-Dihydroxyacetone                       | 2.06x10 <sup>-5</sup> (9.59x10 <sup>-6</sup> ) <sup>a</sup>  | 2.08x10 <sup>-5</sup> (3.54x10 <sup>-6</sup> ) <sup>a</sup> | 1.64x10 <sup>-5</sup> (4.54x10 <sup>-6</sup> ) <sup>a</sup> | 0.875    | 1.97x10 <sup>-5</sup> (2.59x10 <sup>-6</sup> ) | 0.83                   |
| Glucose                                    | 5.89x10 <sup>-3</sup> (7.36x10 <sup>-4</sup> ) <sup>a</sup>  | 6.17x10 <sup>-3</sup> (1.08x10 <sup>-3</sup> ) <sup>a</sup> | 6.06x10 <sup>-3</sup> (5.26x10 <sup>-5</sup> ) <sup>a</sup> | 0.950    | 6.18x10 <sup>-3</sup> (4.29x10 <sup>-4</sup> ) | 0.89                   |
| Glucose-1-phosphate                        | 4.95x10 <sup>-4</sup> (2.01x10 <sup>-4</sup> ) <sup>a</sup>  | 4.52x10 <sup>-4</sup> (1.14x10 <sup>-4</sup> ) <sup>a</sup> | 5.68x10 <sup>-4</sup> (1.63x10 <sup>-4</sup> ) <sup>a</sup> | 0.908    | 2.88x10 <sup>-4</sup> (1.21x10 <sup>-5</sup> ) | 1.97                   |
| Mannose                                    | 2.73x10 <sup>-4</sup> (4.26x10 <sup>-5</sup> ) <sup>ab</sup> | 3.11x10 <sup>-4</sup> (9.82x10 <sup>-5</sup> ) <sup>a</sup> | 2.35x10 <sup>-4</sup> (3.08x10 <sup>-5</sup> ) <sup>b</sup> | 0.039    | 1.77x10 <sup>-4</sup> (3.60x10 <sup>-5</sup> ) | 1.33                   |
| <b>Organic acids and Derivates</b>         |                                                              |                                                             |                                                             |          |                                                |                        |
| 2-Oxovalerate                              | 5.95x10 <sup>-5</sup> (5.19x10 <sup>-5</sup> ) <sup>a</sup>  | 7.42x10 <sup>-5</sup> (4.89x10 <sup>-5</sup> ) <sup>a</sup> | 6.78x10 <sup>-5</sup> (4.85x10 <sup>-5</sup> ) <sup>a</sup> | 0.618    | 8.13x10 <sup>-5</sup> (1.47x10 <sup>-5</sup> ) | 0.83                   |
| 4-Hydroxybutyrate                          | 8.86x10 <sup>-5</sup> (9.80x10 <sup>-5</sup> ) <sup>a</sup>  | 1.09x10 <sup>-4</sup> (8.26x10 <sup>-5</sup> ) <sup>a</sup> | 7.61x10 <sup>-5</sup> (5.59x10 <sup>-5</sup> ) <sup>a</sup> | 0.390    | 5.96x10 <sup>-5</sup> (8.73x10 <sup>-6</sup> ) | 1.28                   |

|              |                                                              |                                                             |                                                             |       |                                                |      |
|--------------|--------------------------------------------------------------|-------------------------------------------------------------|-------------------------------------------------------------|-------|------------------------------------------------|------|
| Acetate      | 3.23x10 <sup>-4</sup> (6.11x10 <sup>-5</sup> ) <sup>a</sup>  | 5.45x10 <sup>-4</sup> (2.67x10 <sup>-4</sup> ) <sup>a</sup> | 4.11x10 <sup>-4</sup> (2.39x10 <sup>-4</sup> ) <sup>a</sup> | 0.180 | 6.08x10 <sup>-4</sup> (1.08x10 <sup>-4</sup> ) | 0.68 |
| Acetoacetate | 3.51x10 <sup>-5</sup> (5.08x10 <sup>-6</sup> ) <sup>a</sup>  | 3.65x10 <sup>-5</sup> (7.37x10 <sup>-6</sup> ) <sup>a</sup> | 1.90x10 <sup>-5</sup> (4.20x10 <sup>-6</sup> ) <sup>a</sup> | 0.108 | 2.67x10 <sup>-5</sup> (3.90x10 <sup>-6</sup> ) | 0.71 |
| Citrate      | 2.11x10 <sup>-4</sup> (6.38x10 <sup>-5</sup> ) <sup>a</sup>  | 1.29x10 <sup>-4</sup> (9.36x10 <sup>-5</sup> ) <sup>a</sup> | 1.05x10 <sup>-4</sup> (5.27x10 <sup>-5</sup> ) <sup>a</sup> | 0.274 | 1.16x10 <sup>-4</sup> (1.53x10 <sup>-5</sup> ) | 0.90 |
| Formate      | 7.43x10 <sup>-5</sup> (7.88x10 <sup>-6</sup> ) <sup>ab</sup> | 6.94x10 <sup>-5</sup> (1.85x10 <sup>-5</sup> ) <sup>b</sup> | 8.34x10 <sup>-5</sup> (5.95x10 <sup>-6</sup> ) <sup>a</sup> | 0.012 | 1.01x10 <sup>-4</sup> (1.76x10 <sup>-5</sup> ) | 0.82 |
| Fumarate     | 1.75x10 <sup>-4</sup> (5.45x10 <sup>-5</sup> ) <sup>a</sup>  | 1.58x10 <sup>-4</sup> (3.61x10 <sup>-5</sup> ) <sup>a</sup> | 1.07x10 <sup>-4</sup> (2.55x10 <sup>-5</sup> ) <sup>a</sup> | 0.235 | 1.68x10 <sup>-4</sup> (3.49x10 <sup>-6</sup> ) | 0.64 |
| Lactate      | 9.91x10 <sup>-2</sup> (1.18x10 <sup>-2</sup> ) <sup>a</sup>  | 9.79x10 <sup>-2</sup> (1.60x10 <sup>-2</sup> ) <sup>a</sup> | 1.03x10 <sup>-1</sup> (9.46x10 <sup>-3</sup> ) <sup>a</sup> | 0.464 | 9.82x10 <sup>-2</sup> (1.04x10 <sup>-3</sup> ) | 1.05 |
| Malate       | 1.21x10 <sup>-3</sup> (4.08x10 <sup>-4</sup> ) <sup>a</sup>  | 1.36x10 <sup>-3</sup> (2.85x10 <sup>-4</sup> ) <sup>a</sup> | 1.06x10 <sup>-3</sup> (1.02x10 <sup>-4</sup> ) <sup>a</sup> | 0.147 | 1.28x10 <sup>-3</sup> (5.29x10 <sup>-5</sup> ) | 0.83 |
| Malonate     | 1.18x10 <sup>-3</sup> (6.98x10 <sup>-5</sup> ) <sup>a</sup>  | 1.24x10 <sup>-3</sup> (3.85x10 <sup>-4</sup> ) <sup>a</sup> | 8.21x10 <sup>-4</sup> (3.50x10 <sup>-4</sup> ) <sup>a</sup> | 0.258 | 9.72x10 <sup>-4</sup> (3.80x10 <sup>-5</sup> ) | 0.84 |
| Pyruvate     | 2.46x10 <sup>-4</sup> (1.71x10 <sup>-4</sup> ) <sup>a</sup>  | 1.40x10 <sup>-4</sup> (8.06x10 <sup>-5</sup> ) <sup>a</sup> | 1.99x10 <sup>-4</sup> (1.61x10 <sup>-4</sup> ) <sup>a</sup> | 0.656 | 1.17x10 <sup>-4</sup> (3.04x10 <sup>-6</sup> ) | 1.70 |

#### Nucleosides, Nucleotides and Analogues

|              |                                                              |                                                             |                                                             |       |                                                |                   |
|--------------|--------------------------------------------------------------|-------------------------------------------------------------|-------------------------------------------------------------|-------|------------------------------------------------|-------------------|
| Hypoxanthine | 5.01x10 <sup>-3</sup> (1.62x10 <sup>-3</sup> ) <sup>a</sup>  | 5.55x10 <sup>-3</sup> (1.10x10 <sup>-3</sup> ) <sup>a</sup> | 4.24x10 <sup>-3</sup> (4.07x10 <sup>-4</sup> ) <sup>a</sup> | 0.426 | 9.29x10 <sup>-3</sup> (1.63x10 <sup>-4</sup> ) | 0.46 <sup>*</sup> |
| IMP          | 1.39x10 <sup>-4</sup> (1.74x10 <sup>-4</sup> ) <sup>ab</sup> | 4.30x10 <sup>-4</sup> (2.29x10 <sup>-4</sup> ) <sup>a</sup> | 1.20x10 <sup>-4</sup> (3.44x10 <sup>-5</sup> ) <sup>b</sup> | 0.031 | 4.18x10 <sup>-4</sup> (3.91x10 <sup>-5</sup> ) | 0.28 <sup>*</sup> |
| Inosine      | 1.73x10 <sup>-4</sup> (1.35x10 <sup>-4</sup> ) <sup>ab</sup> | 3.81x10 <sup>-4</sup> (1.89x10 <sup>-4</sup> ) <sup>a</sup> | 1.76x10 <sup>-4</sup> (4.33x10 <sup>-5</sup> ) <sup>b</sup> | 0.021 | 3.97x10 <sup>-4</sup> (2.68x10 <sup>-5</sup> ) | 0.44 <sup>*</sup> |
| myo-Inositol | 1.46x10 <sup>-3</sup> (3.25x10 <sup>-3</sup> ) <sup>a</sup>  | 5.94x10 <sup>-4</sup> (2.56x10 <sup>-3</sup> ) <sup>a</sup> | 1.71x10 <sup>-4</sup> (2.68x10 <sup>-4</sup> ) <sup>a</sup> | 0.176 | 1.49x10 <sup>-3</sup> (1.02x10 <sup>-4</sup> ) | 0.11 <sup>*</sup> |
| Niacinamide  | 4.77x10 <sup>-4</sup> (1.06x10 <sup>-4</sup> ) <sup>a</sup>  | 5.34x10 <sup>-4</sup> (1.20x10 <sup>-4</sup> ) <sup>a</sup> | 5.79x10 <sup>-4</sup> (4.80x10 <sup>-5</sup> ) <sup>a</sup> | 0.695 | 5.14x10 <sup>-4</sup> (6.78x10 <sup>-6</sup> ) | 1.13              |
| UMP          | 6.91x10 <sup>-5</sup> (1.81x10 <sup>-5</sup> ) <sup>a</sup>  | 7.74x10 <sup>-5</sup> (2.58x10 <sup>-5</sup> ) <sup>a</sup> | 8.89x10 <sup>-5</sup> (2.03x10 <sup>-5</sup> ) <sup>a</sup> | 0.511 | 4.89x10 <sup>-5</sup> (1.77x10 <sup>-6</sup> ) | 1.82              |
| Uridine      | 8.95x10 <sup>-5</sup> (2.35x10 <sup>-5</sup> ) <sup>a</sup>  | 8.84x10 <sup>-5</sup> (2.11x10 <sup>-5</sup> ) <sup>a</sup> | 9.04x10 <sup>-5</sup> (7.09x10 <sup>-6</sup> ) <sup>a</sup> | 0.794 | 1.36x10 <sup>-4</sup> (1.30x10 <sup>-5</sup> ) | 0.66              |
| Xanthine     | 2.82x10 <sup>-4</sup> (6.33x10 <sup>-5</sup> ) <sup>a</sup>  | 2.55x10 <sup>-4</sup> (4.63x10 <sup>-5</sup> ) <sup>a</sup> | 3.09x10 <sup>-4</sup> (2.66x10 <sup>-5</sup> ) <sup>a</sup> | 0.240 | 2.87x10 <sup>-4</sup> (1.60x10 <sup>-5</sup> ) | 1.08              |

#### Miscellaneous

|                   |                                                             |                                                             |                                                             |       |                                                |                   |
|-------------------|-------------------------------------------------------------|-------------------------------------------------------------|-------------------------------------------------------------|-------|------------------------------------------------|-------------------|
| Acetoin           | 1.16x10 <sup>-5</sup> (1.50x10 <sup>-6</sup> ) <sup>a</sup> | 1.12x10 <sup>-5</sup> (3.68x10 <sup>-5</sup> ) <sup>a</sup> | 1.52x10 <sup>-5</sup> (6.62x10 <sup>-5</sup> ) <sup>a</sup> | 0.428 | 4.46x10 <sup>-6</sup> (1.63x10 <sup>-6</sup> ) | 3.42 <sup>*</sup> |
| Carnitine         | 8.77x10 <sup>-3</sup> (2.79x10 <sup>-3</sup> ) <sup>a</sup> | 6.36x10 <sup>-3</sup> (8.25x10 <sup>-4</sup> ) <sup>a</sup> | 5.30x10 <sup>-3</sup> (1.41x10 <sup>-3</sup> ) <sup>a</sup> | 0.127 | 7.21x10 <sup>-3</sup> (6.45x10 <sup>-4</sup> ) | 0.73              |
| Choline           | 9.71x10 <sup>-4</sup> (6.22x10 <sup>-4</sup> ) <sup>a</sup> | 5.44x10 <sup>-4</sup> (7.76x10 <sup>-4</sup> ) <sup>a</sup> | 1.02x10 <sup>-3</sup> (7.20x10 <sup>-4</sup> ) <sup>a</sup> | 0.727 | 3.44x10 <sup>-3</sup> (4.36x10 <sup>-4</sup> ) | 0.30 <sup>*</sup> |
| Dimethyl sulfone  | 1.08x10 <sup>-4</sup> (5.30x10 <sup>-6</sup> ) <sup>a</sup> | 9.97x10 <sup>-5</sup> (1.60x10 <sup>-5</sup> ) <sup>a</sup> | 1.15x10 <sup>-4</sup> (6.61x10 <sup>-6</sup> ) <sup>a</sup> | 0.597 | 1.03x10 <sup>-4</sup> (1.59x10 <sup>-6</sup> ) | 1.12              |
| Guanidoacetate    | 1.79x10 <sup>-3</sup> (7.67x10 <sup>-4</sup> ) <sup>a</sup> | 2.27x10 <sup>-3</sup> (8.18x10 <sup>-4</sup> ) <sup>a</sup> | 2.53x10 <sup>-3</sup> (5.43x10 <sup>-4</sup> ) <sup>a</sup> | 0.107 | 1.40x10 <sup>-3</sup> (2.68x10 <sup>-5</sup> ) | 1.80              |
| Glycerol          | 4.96x10 <sup>-3</sup> (1.40x10 <sup>-3</sup> ) <sup>a</sup> | 6.39x10 <sup>-3</sup> (1.32x10 <sup>-3</sup> ) <sup>a</sup> | 5.63x10 <sup>-3</sup> (1.36x10 <sup>-3</sup> ) <sup>a</sup> | 0.101 | 3.97x10 <sup>-3</sup> (1.62x10 <sup>-4</sup> ) | 1.42              |
| Methanol          | 3.25x10 <sup>-4</sup> (6.03x10 <sup>-4</sup> ) <sup>a</sup> | 1.42x10 <sup>-4</sup> (3.73x10 <sup>-4</sup> ) <sup>a</sup> | 7.63x10 <sup>-5</sup> (3.93x10 <sup>-5</sup> ) <sup>a</sup> | 0.114 | 1.71x10 <sup>-4</sup> (5.24x10 <sup>-6</sup> ) | 0.45 <sup>*</sup> |
| O-Acetylcarnitine | 6.25x10 <sup>-4</sup> (3.56x10 <sup>-4</sup> ) <sup>a</sup> | 3.60x10 <sup>-4</sup> (4.78x10 <sup>-4</sup> ) <sup>a</sup> | 7.23x10 <sup>-4</sup> (3.97x10 <sup>-4</sup> ) <sup>a</sup> | 0.841 | 2.18x10 <sup>-3</sup> (2.89x10 <sup>-4</sup> ) | 0.33 <sup>*</sup> |
| Trimethylamine    | 2.32x10 <sup>-5</sup> (2.38x10 <sup>-6</sup> ) <sup>a</sup> | 2.03x10 <sup>-5</sup> (4.49x10 <sup>-6</sup> ) <sup>a</sup> | 1.49x10 <sup>-5</sup> (4.71x10 <sup>-6</sup> ) <sup>a</sup> | 0.190 | 2.13x10 <sup>-5</sup> (8.27x10 <sup>-7</sup> ) | 0.70              |

<sup>1</sup> Means with different letters (a, b and ab) are significantly different at p<0.05. \* Molecules characterized by a the fold change below 0.5 or above 2 [32].

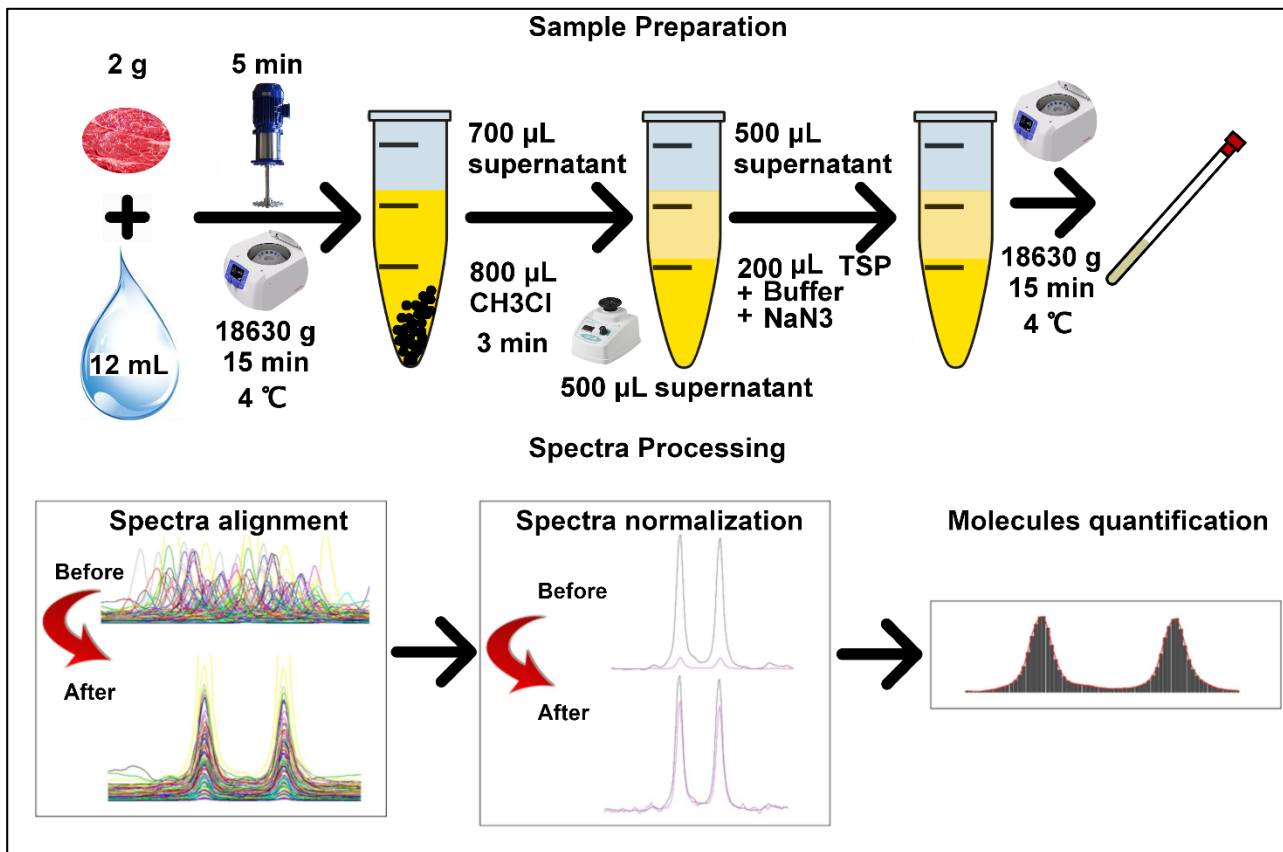

Figure S1. Graphic design of the workflow for meat samples preparation and  $^1\text{H}$ -NMR spectra processing.

**Figures S2-S13:** Above panel - portions of the spectra, superimposed in white-washed mode. The black and red dashed lines show the portions of the spectra employed for the quantification of each molecule. Below – one representative spectrum (black line) superimposed to the signals simulated by software Chenomx (red line) for each of the molecules listed.

2

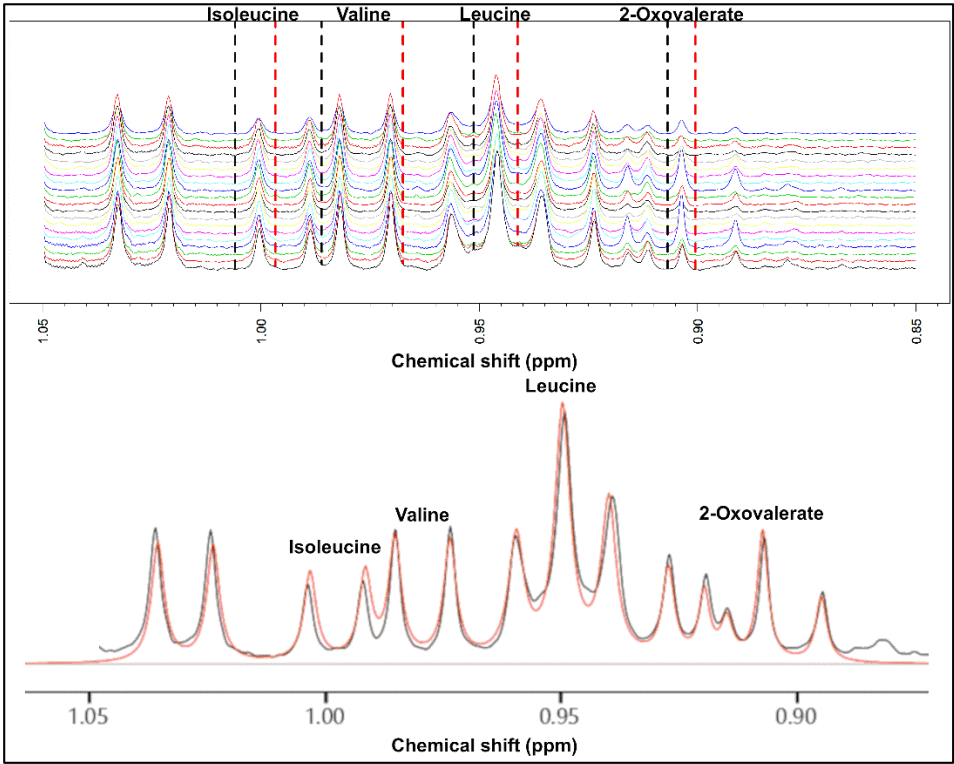

3

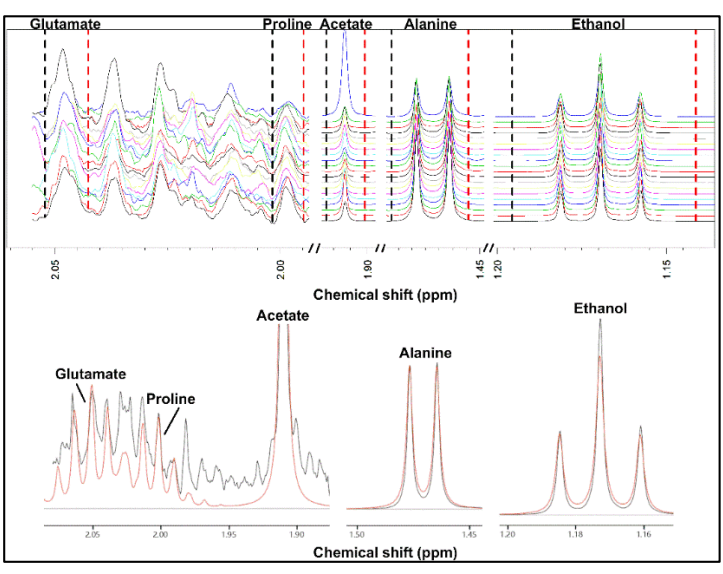

4

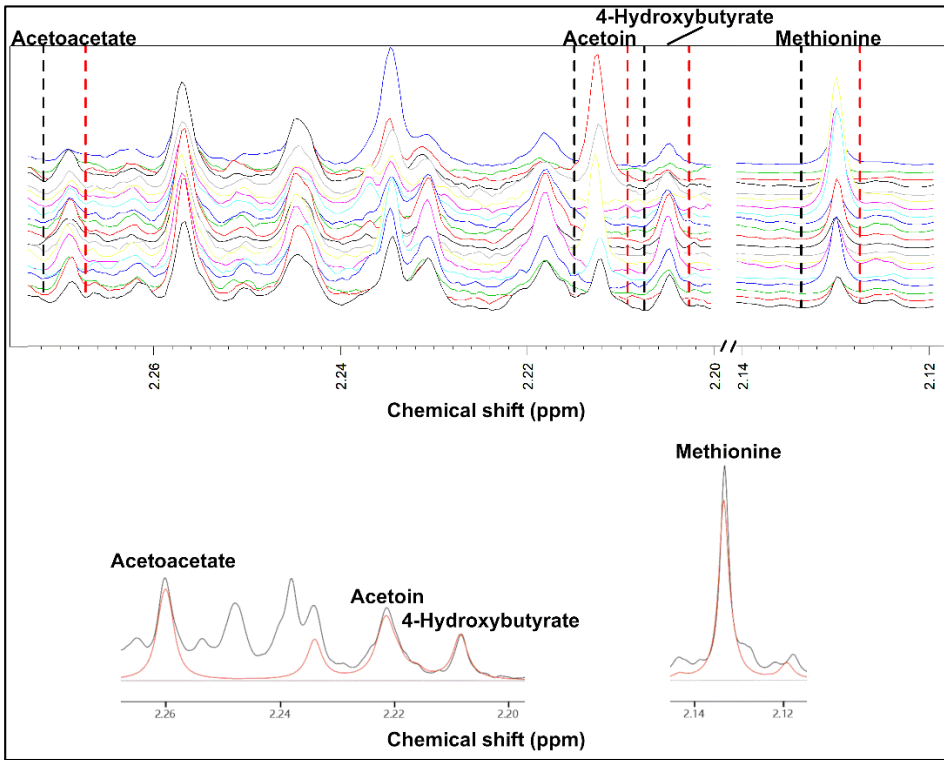

5

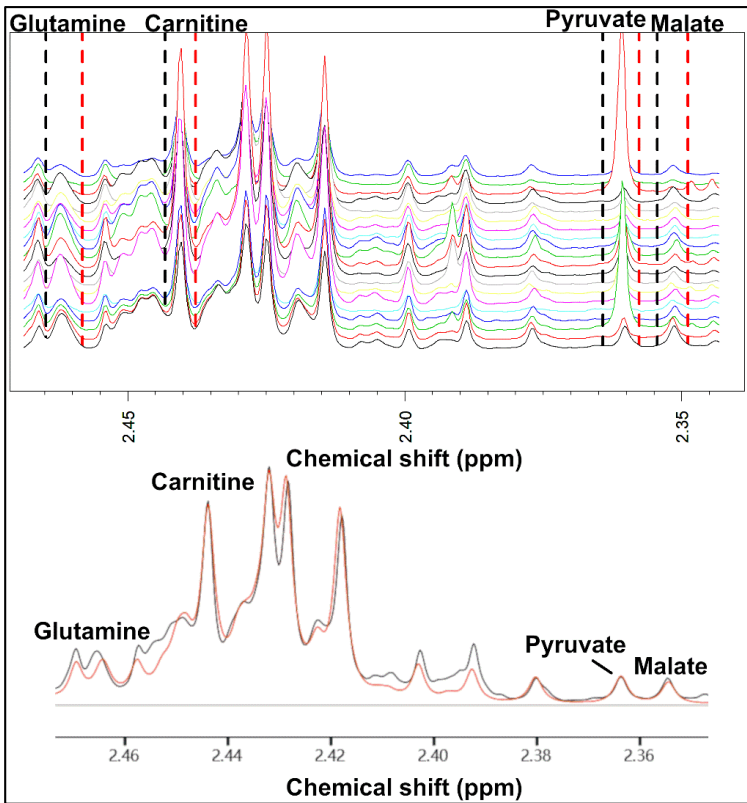

6

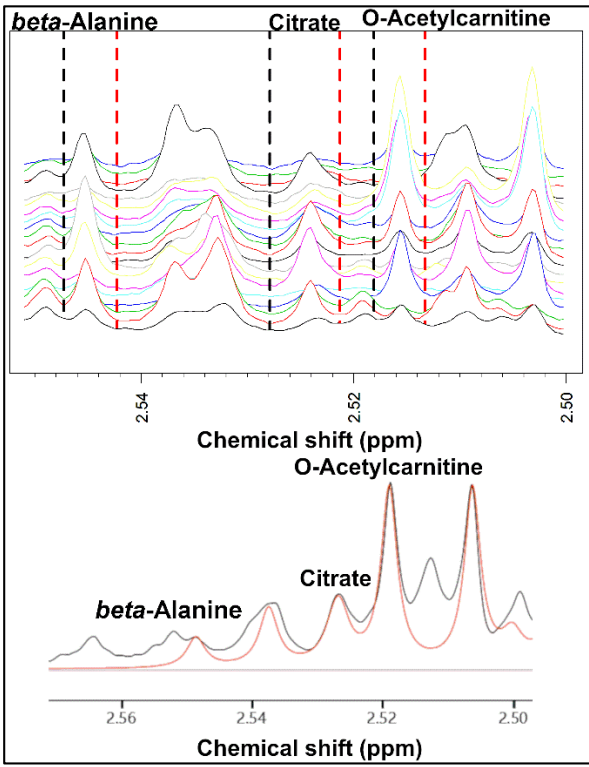

7

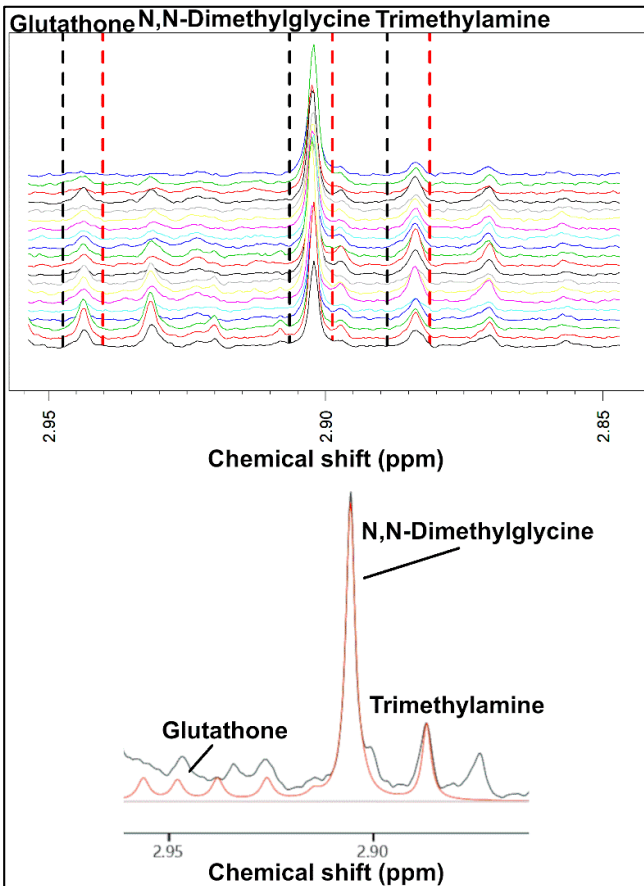

8

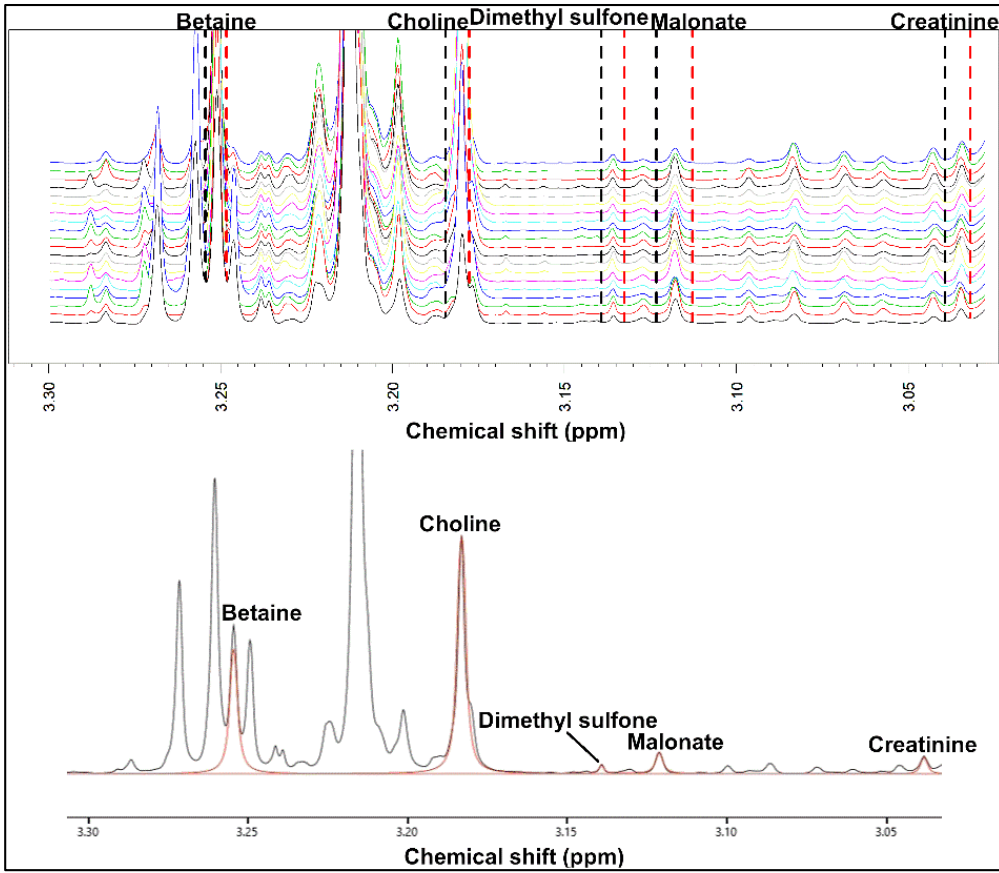

9

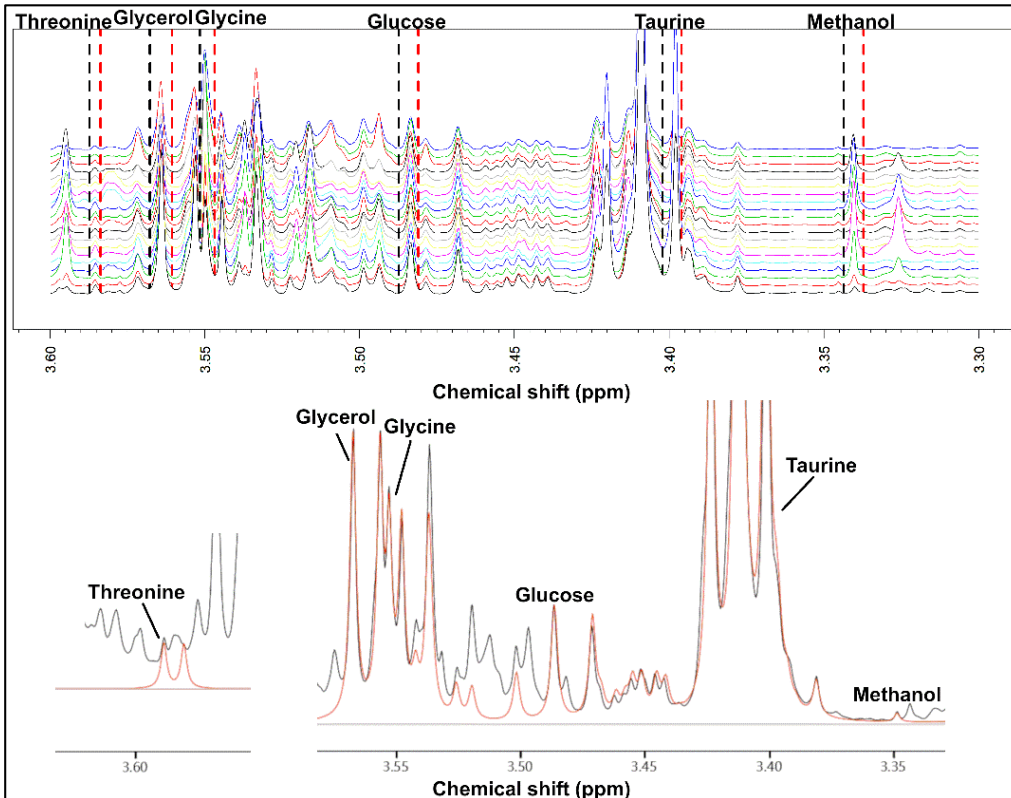

10

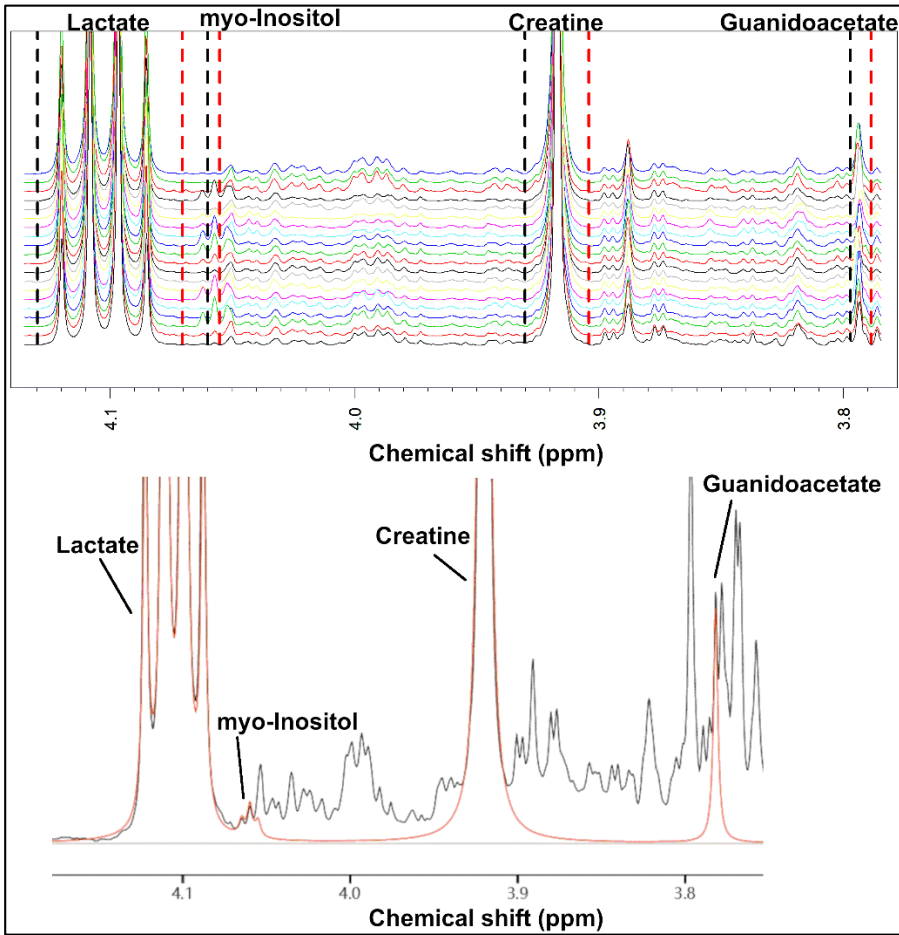

11

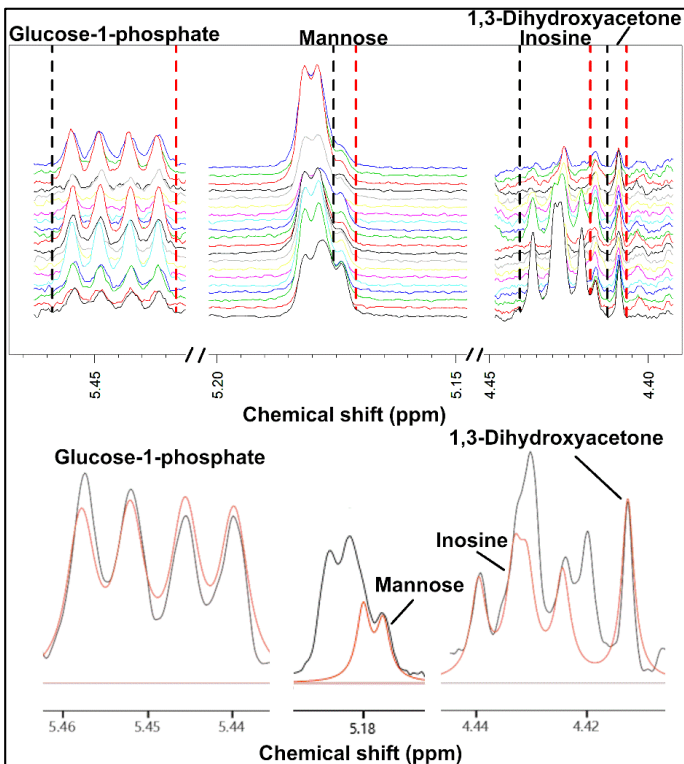



12

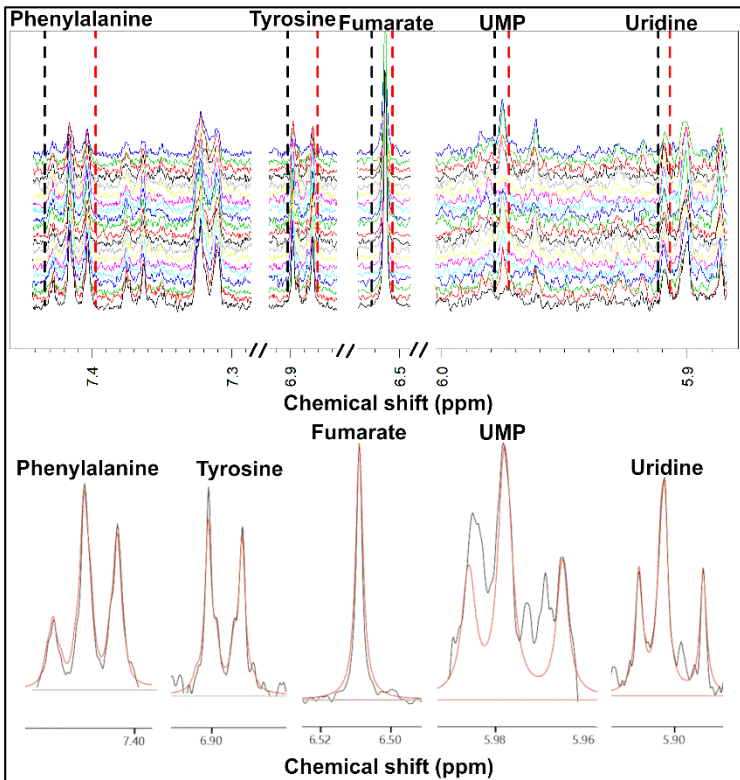

13

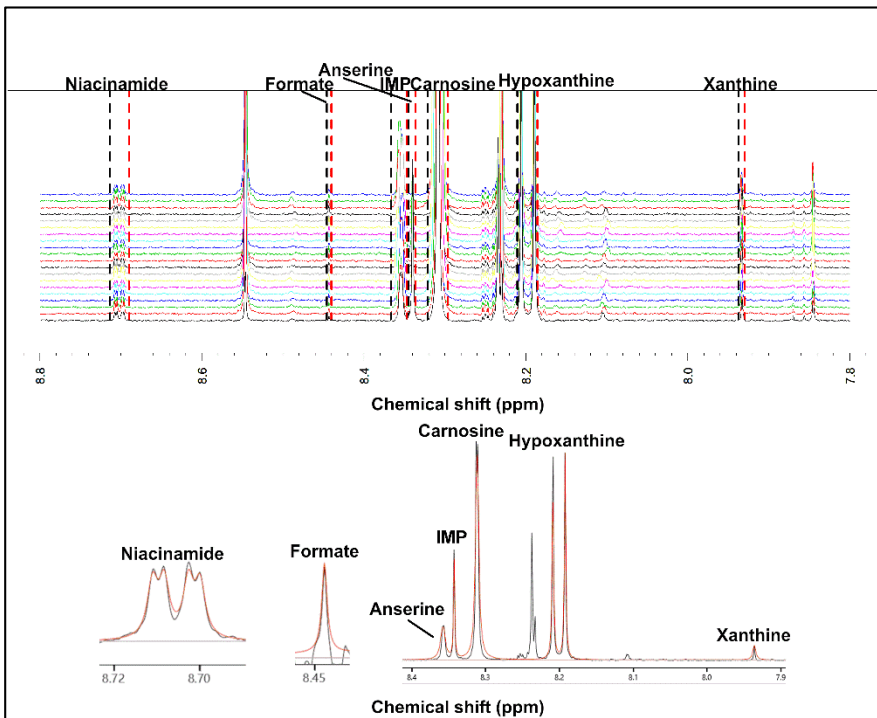

Supplement: foods-09-00481-s001.pdf [file foods-09-00481-s001.pdf]
